# Supplementary material for: Coming and going – Historical distributions of the European oyster Ostrea edulis Linnaeus, 1758 and the introduced slipper limpet Crepidula fornicata Linnaeus, 1758 in the North Sea
Source: PLoS One. 2019 Oct 24;14(10):e0224249. doi: 10.1371/journal.pone.0224249 (PMC6812771; doi:10.1371/journal.pone.0224249)
Supplement: S1 Table — (XLSX) [file pone.0224249.s003.xlsx]

## Sheet: Ostrea edulis 19th century
catalogue number	facility	sampling date	location	latitude	longitude	status	Publication
Mo 5/1	ZMK	ca. 1820	Germany, Schleswig-Holstein, North Frisian Wadden Sea	55.056	8.41318	found alive
Mo 270	ZMK	1843	Germany, Schleswig-Holstein, Sylt, oyster beds	55.132	8.5578	unknown
Mo 18/2	ZMK	Sep 1868	Germany, Schleswig-Holstein, North Sea, west coast	55.056	8.41318	found alive
Mo 81/3	ZMK	1869	England, Essex, North Sea coast, estuary of the river Blackwater	51.7577	0.883627	unknown
Mo 83/2	ZMK	1869	England, Essex, North Sea coast, estuary of the river Roach	51.6156	0.866527	found alive
Mo 84/2	ZMK	1869	England, Essex, North Sea coast, estuary of the river Colne	51.7862	0.987053	found alive
Mo 85/2	ZMK	1869	England, Southern Bight, estuary of the Thames	51.519	0.786896	found dead
Mo 98/3	ZMK	Apr 1869	France, Nouvelle-Aquitaine, la Tremblade, estuary of the river Tremblade, “green oysters”, bred in the claires	45.8449	-1.16771	found alive
Mo 99/3	ZMK	Apr 1869	France, Bretagne, la Trinité, Atlantic coast	47.5777	-3.05235	found alive
Mo 100/1	ZMK	Apr 1869	France, Bretagne, la Trinité, Atlantic coast	47.5777	-3.05235	found alive
Mo 101/1	ZMK	Apr 1869	France, Bretagne, la Trinité, Atlantic coast	47.5777	-3.05235	found alive
Mo 102/17	ZMK	Apr 1869	France, Nouvelle-Aquitaine, Bassin d’Arcachon, Atlantic coast	44.6152	-1.20515	found alive
Mo 97/8	ZMK	17.04.1869	France, Nouvelle-Aquitaine, Île de Ré	46.1907	-1.30734	unknown
Mo 86/7	ZMK	May 1869	England, Kent, North Sea coast, Whitstable, estuary of the Thames	51.519	0.786896	unknown
Mo 88/1	ZMK	May 1869	England, Kent, North Sea coast, Herne Bay, estuary of the Thames	51.519	0.786896	found alive
Mo 90/1	ZMK	May 1869	England, Hampshire, Hayling island, near Portsmouth	50.7855	-1.02997	found alive
Mo 94/2	ZMK	May 1869	England, Cornwall, Saltash, estuary of the river Tamar	50.3163	-4.18682	found alive
Mo 106/11	ZMK	May 1869	France, Provence-Alpes-Côte d’Azur, Toulon, Mediterranean coast, artificial oyster bed “la Seyne”	43.1157	5.8876	found dead
Mo 87	ZMK	06.05.1869	England, Kent, North Sea coast, Herne Bay, estuary of the Thames	51.519	0.786896	unknown
Mo 89/12	ZMK	06.05.1869	England, Kent, North Sea coast, Reculver, estuary of the Thames	51.519	0.786896	unknown
Mo 82/3	ZMK	10.05.1869	England, Essex, North Sea coast, estuary of the river Crouch	51.6199	0.959017	found alive
Mo 91/10	ZMK	11.05.1869	England, Hampshire, Hayling island, near Portsmouth	50.7855	-1.02997	unknown
Mo 92/4	ZMK	11.05.1869	England, Hampshire, Hayling island, near Portsmouth	50.7855	-1.02997	unknown
Mo 202	ZMK	Jun 1869	Germany, Schleswig-Holstein, Sylt	55.0582	8.41631	found dead
Mo 46/10	ZMK	Dez 1869	Denmark, Limfjord	57.1061	9.7834	found alive
Mo 118/4	ZMK	Jul 1870	Italy, Venetia, lagoon of Venice	45.1839	12.2568	found alive
Mo 72/1	ZMK	14.08.1870s	Germany, Schleswig-Holstein, North Sea, west coast, Amrum	54.7122	8.35738	found alive
Mo 53/1	ZMK	25.08.1870	Germany, Schleswig-Holstein, North Sea, west coast, oyster bed on Sylt near List	55.0582	8.41631	found alive
Mo 39/1	ZMK	27.12.1870	Germany, Schleswig-Holstein, North Sea, west coast	55.056	8.41318	found alive
Mo 25/1	ZMK	24.03.1871	Germany, Schleswig-Holstein, North Sea, west coast	55.056	8.41318	found alive
Mo 57/1	ZMK	May 1871	Germany, Schleswig-Holstein, North Sea, west coast, east of Sylt, “Huntje” oyster bed	54.9721	8.46703	found alive
Mo 51/14	ZMK	Aug 1876	Germany, Schleswig-Holstein, North Sea, west coast, oyster beds of Sylt	55.0582	8.41631	unknown
Mo 8/1	ZMK	13.08.1876	Germany, Schleswig-Holstein, North Sea, west coast	55.056	8.41318	found alive
Mo 66/1	ZMK	Apr 1877	Germany, Schleswig-Holstein, North Sea, west coast, oyster bed near Hörnum on Sylt	54.7936	8.295	found alive
Mo 56/2	ZMK	24.05.1877	Denmark, North Sea, west coast, east of Rømø, “Tagholm” oyster bed	55.1166	8.56494	found alive
Mo 71/1	ZMK	22.05.1877	Germany, Schleswig-Holstein, North Sea, west coast, Amrum, “Rochel Pahlen” oyster bed	54.6864	8.29763	found alive
Mo 73/8	ZMK	22.05.1877	Germany, Schleswig-Holstein, North Sea, west coast, “Westen Amrum” oyster bed	54.6819	8.3039	found alive
Mo 68/8	ZMK	22.05.1877/	Germany, Schleswig-Holstein, North Sea, west coast, oyster bed near Hörnum on Sylt	54.7936	8.295	found alive
		23.05.1877
Mo 58/6	ZMK	23.05.1877	Germany, Schleswig-Holstein, North Sea, west coast, east of Sylt, “Huntje” oyster bed	54.9721	8.46703	unknown
Mo 69/1	ZMK	1878	Germany, Schleswig-Holstein, North Sea, west coast	55.056	8.41318	found alive
Mo 75/1	ZMK	1878	Germany, Schleswig-Holstein, North Sea, west coast, “Süden Gröde” oyster bed	54.6219	8.72212	found alive
Mo 80/3	ZMK	Mar 1878	The Netherlands, Zeeland, Oosterschelde, market oysters	51.8849	4.02728	found alive
/	ZIMG	1879	England	51.6717	0.951666	unknown
28652	ZIMG	1879	Holland	52.6955	5.43409	found alive
Mo 13/3	ZMK	Aug 1879	Germany, Schleswig-Holstein, North Sea, west coast	55.056	8.41318	found alive
Mo 76/7	ZMK	Jul 1881	Germany, Schleswig-Holstein, North Sea, west coast, sedimentation tank of Husum	54.4702	9.03264	unknown
Mo 77/6	ZMK	26.08.1881	Germany, Schleswig-Holstein, 8-10 geogr. Miles northwest of Helgoland	54.2463	7.74798	found alive
Mo 54/2	ZMK	25.08.1882	Germany, Schleswig-Holstein, North Sea, west coast, east of Sylt	55.0538	8.63756	found alive
Mo 62/4	ZMK	26.08.1882	Germany, Schleswig-Holstein, North Sea, west coast, east of Sylt, “Huntje” oyster bed	54.9721	8.46703	found alive
Mo 200/1	ZMK	Oktober 1882	England, Essex, Red Crag, Walton-on-the-Naze	51.8623	1.28975	found dead
Mo 64/3	ZMK	Aug 1884	Germany, Schleswig-Holstein, North Sea, west coast, Sylt near Morsum Odde	54.8544	8.42901	found alive
Mo 59/3	ZMK	22.08.1884	Germany, Schleswig-Holstein, North Sea, west coast, east of Sylt, “Huntje” oyster bed	54.9721	8.46703	unknown
Mo 60/1	ZMK	23.08.1884	Germany, Schleswig-Holstein, North Sea, west coast, east of Sylt, “Huntje” oyster bed	54.9721	8.46703	found dead
Mo 61/3	ZMK	23.08.1884	Germany, Schleswig-Holstein, North Sea, west coast, east of Sylt, “Huntje” oyster bed	54.9721	8.46703	found alive
Mo 55/2	ZMK	24.08.1884	Germany, Schleswig-Holstein, Sylt	55.0582	8.41631	found alive
Mo 70/4	ZMK	29.05.1885	Germany, Schleswig-Holstein, North Sea, west coast, “Wylus” oyster bed on Föhr	54.757	8.54102	found alive
Mo 48/1	ZMK	30.05.1885	Germany, Schleswig-Holstein, North Sea, west coast, south of Sylt, “Tayde Mochels” oyster bed	54.9504	8.46565	found dead
Mo 49/2	ZMK	30.05.1885	Germany, Schleswig-Holstein, North Sea, west coast, south of Sylt, “Tayde Mochels” oyster bed	54.9504	8.46565	found dead
Mo 65/1	ZMK	Sep 1886	Germany, Schleswig-Holstein, North Sea, west coast	55.056	8.41318	found alive
Biv 0495	ZSRO	Nov 1890	The Netherlands, North sea coast	53.2414	7.19739	found alive
