# Supplementary material for: Coming and going – Historical distributions of the European oyster Ostrea edulis Linnaeus, 1758 and the introduced slipper limpet Crepidula fornicata Linnaeus, 1758 in the North Sea
Source: PLoS One. 2019 Oct 24;14(10):e0224249. doi: 10.1371/journal.pone.0224249 (PMC6812771; doi:10.1371/journal.pone.0224249)
Supplement: S2 Table — (XLSX) [file pone.0224249.s004.xlsx]

## Sheet: Ostrea edulis 20th century
catalogue number	facility	sampling date	location	latitude	longitude	status	publication
Mo 8942/1	ZMK	1903-07-24	03. VII. St. 78	54.8	5.81667	found alive
2679157	NHML	1904	England, Devon, off Plymouth	50.3549	-4.15021	unknown	http://data.nhm.ac.uk/object/aada862e-e7de-460b-979f-fbeae7659c68
Mo 192	ZMK	1905	Germany, Nordrhein-Westfalen, Wesel, river rhine bank	51.7049	6.45653	found dead
Mo 8945/4	ZMK	1905-03-04	05. III. St. 2	65.9167	3.28333	found alive
Mo 8943/1	ZMK	1905-03-19	05 III., St. 25	54375	5.26667	found alive
Mo 8944/1	ZMK	1905-03-20	05. III. St. 27	54.8667	5.95	found alive
Mo 8946/1	ZMK	1905-03-20	05. III. St. 27	54.8667	5.95	found alive
Mo 192	ZMK	1905	Rhine River, Wesel, Germany	51.7049	6.45653	found dead
Mo 8945/4	ZMK	1905-03-04	05. III. St. 2	65.9167	3.28333	found alive
Mo 8943/1	ZMK	1905-03-19	05 III., St. 25	54.375	5.26667	found alive
Mo 8944/1	ZMK	1905-03-20	05. III. St. 27	54.8667	5.95	found alive
Mo 8946/1	ZMK	1905-03-20	05. III. St. 27	54.8667	5.95	found alive
Mo 8189	ZMK	1906-02-01	06. II. N Kurre, nach N14, „Hornsriff Außengrund“	56.2167	7.35	found alive
ZMA.MOLL.415132	NMNL	1914-1918	France, Bretagne, Island Jersey	49.25	-2.25526	unknown	http://data.biodiversitydata.nl/naturalis/specimen/ZMA.MOLL.415132
ZMA.MOLL.108456	NMNL	1915	The Netherlands, Zeeland, Bruinisse	51.6674	4.09568	unknown	http://data.biodiversitydata.nl/naturalis/specimen/ZMA.MOLL.108456
RMNH.MOL.320021	NMNL	1915	North Sea	56.511	3.51562	unknown	http://data.biodiversitydata.nl/naturalis/specimen/RMNH.MOL.320021
2446323	NHML	1917		38.4521	-75.0482	found dead
ZMA.MOLL.108561	NMNL	1918-08-14	The Netherlands, Zeeland, Yersche	51.5191	4.01716	found dead	http://data.biodiversitydata.nl/naturalis/specimen/ZMA.MOLL.108561
ZMA.MOLL.108514	NMNL	1920	The Netherlands, South Holland, Scheveningen	52.0824	4.23392	unknown	http://data.biodiversitydata.nl/naturalis/specimen/ZMA.MOLL.108514
ZMA.MOLL.108478	NMNL	1920	The Netherlands, Zeeland, Dreischor	51.7175	3.98404	unknown	http://data.biodiversitydata.nl/naturalis/specimen/ZMA.MOLL.108478
ZMA.MOLL.108463	NMNL	1920	The Netherlands, North Holland, Den Helder	52.9158	4.71299	unknown	http://data.biodiversitydata.nl/naturalis/specimen/ZMA.MOLL.108463
ZMA.MOLL.114469	NMNL	1920	The Netherlands, Zeeland, Anna Jacobapolder St. Filipsland	51.606	4.1731	found dead	http://data.biodiversitydata.nl/naturalis/specimen/ZMA.MOLL.114469
ZMA.MOLL.108519	NMNL	1920	The Netherlands, Zeeland, Anna Jacoba polder; St.Filipsland	51.606	4.1731	unknown	http://data.biodiversitydata.nl/naturalis/specimen/ZMA.MOLL.108519
ZMA.MOLL.108578	NMNL	1920	The Netherlands, North Holland, Zandvoort	52.4003	4.53871	Found dead	http://data.biodiversitydata.nl/naturalis/specimen/ZMA.MOLL.108578
ZMA.MOLL.108511	NMNL	1920-06-17	The Netherlands, Zeeland, Philippine at Isabella lock	51.3131	3.73177	unknown	http://data.biodiversitydata.nl/naturalis/specimen/ZMA.MOLL.108511
ZMA.MOLL.108553	NMNL	1920-09-05	The Netherlands, Zeeland, Walcheren	51.5347	3.43318	found dead	http://data.biodiversitydata.nl/naturalis/specimen/ZMA.MOLL.108553
ZMA.MOLL.114453	NMNL	1922-06-15	The Netherlands, Zeeland, Domburg	51.5505	3.45695	unknown	http://data.biodiversitydata.nl/naturalis/specimen/ZMA.MOLL.114453
ZMA.MOLL.108465	NMNL	1922-06-15	The Netherlands, Zeeland, Domburg	51.5505	3.45695	unknown	http://data.biodiversitydata.nl/naturalis/specimen/ZMA.MOLL.108465
ZMA.MOLL.108534	NMNL	1922-06-25	The Netherlands, North Holland, Texel	53.1854	4.85608	found dead	http://data.biodiversitydata.nl/naturalis/specimen/ZMA.MOLL.108534
ZMA.MOLL.108464	NMNL	1923	The Netherlands, Noord Holland, Den Helder	52.9158	4.71299	unknown	http://data.biodiversitydata.nl/naturalis/specimen/ZMA.MOLL.108464
ZMA.MOLL.415110	NMNL	1924-04-01	France, Bretagne, Iles des Glénans	47.7247	-4.03536	found dead	http://data.biodiversitydata.nl/naturalis/specimen/ZMA.MOLL.415110
ZMA.MOLL.415118	NMNL	1924-04-22	France, Bretagne, Locmariaquer	47.5837	-2.98974	unknown	http://data.biodiversitydata.nl/naturalis/specimen/ZMA.MOLL.415118
ZMA.MOLL.108518	NMNL	1924-06-08	The Netherlands, Zeeland, Schouwen	51.6889	3.78667	found dead	http://data.biodiversitydata.nl/naturalis/specimen/ZMA.MOLL.108518
ZMA.MOLL.114435	NMNL	1924-10-12	The Netherlands, Zeeland, Domburg, beach	51.5505	3.45695	unknown	http://data.biodiversitydata.nl/naturalis/specimen/ZMA.MOLL.114435
ZMA.MOLL.112556	NMNL	1925-01-04	The Netherlands, Noord Holland, IJmuiden	52.4403	4.5564	found dead	http://data.biodiversitydata.nl/naturalis/specimen/ZMA.MOLL.112556
ZMA.MOLL.112560	NMNL	1926-07-01	The Netherlands, Friesland, Terschelling	53.352	5.15167	unknown	http://data.biodiversitydata.nl/naturalis/specimen/ZMA.MOLL.112560
ZMA.MOLL.114445	NMNL	1926-08-01	The Netherlands, North Brabant, Bergen op Zoom	51.5115	4.22056	unknown	http://data.biodiversitydata.nl/naturalis/specimen/ZMA.MOLL.114445
ZMA.MOLL.108448	NMNL	1926-08-01	The Netherlands, Noord Brabant, Bergen op Zoom	51.5115	4.22056	unknown	http://data.biodiversitydata.nl/naturalis/specimen/ZMA.MOLL.108448
ZMA.MOLL.108575	NMNL	1926-08-13	The Netherlands, Zeeland, Yerseke	51.5191	4.01716	unknown	http://data.biodiversitydata.nl/naturalis/specimen/ZMA.MOLL.108575
ZMA.MOLL.108537	NMNL	1926-08-24	The Netherlands, Noord Holland, Texel	53.1854	4.85608	unknown	http://data.biodiversitydata.nl/naturalis/specimen/ZMA.MOLL.108537
ZMA.MOLL.108529	NMNL	1926-08-24	The Netherlands, Friesland, Terschelling	53.352	5.15167	found dead	http://data.biodiversitydata.nl/naturalis/specimen/ZMA.MOLL.108529
ZMA.MOLL.108510	NMNL	1926-09-01	The Netherlands, North Holland, Petten-Camperduin	52.7706	4.66248	found dead	http://data.biodiversitydata.nl/naturalis/specimen/ZMA.MOLL.108510
ZMA.MOLL.114432	NMNL	Mar 1927	The Netherlands, Zeeland, Vlissingen	51.4395	3.60113	unknown	http://data.biodiversitydata.nl/naturalis/specimen/ZMA.MOLL.114432
ZMA.MOLL.108488	NMNL	1928-02-18	The Netherlands, North Holland, IJmuiden	52.4403	4.5564	found dead	http://data.biodiversitydata.nl/naturalis/specimen/ZMA.MOLL.108488
ZMA.MOLL.108548	NMNL	1928-08-01	The Netherlands, Friesland, Vlieland	53.2068	4.8465	found dead	http://data.biodiversitydata.nl/naturalis/specimen/ZMA.MOLL.108548
RMNH.MOL.319330	NMNL	Aug/Sep 1928	France, Bretagne, close to Roscoff	48.7184	-4.01365	unknown	http://data.biodiversitydata.nl/naturalis/specimen/RMNH.MOL.319330
ZMA.MOLL.108503	NMNL	1929-03-03	The Netherlands, Zeeland, Oostkapelle	51.572	3.50855	unknown	http://data.biodiversitydata.nl/naturalis/specimen/ZMA.MOLL.108503
ZMA.MOLL.108505	NMNL	1929-03-13	The Netherlands, Zeeland, Oranjezon	51.5916	3.55968	unknown	http://data.biodiversitydata.nl/naturalis/specimen/ZMA.MOLL.108505
RMNH.MOL.319327	NMNL	May-Jun 1929	United Kingdom	49.9571	-5.21576	unknown	http://data.biodiversitydata.nl/naturalis/specimen/RMNH.MOL.319327
ZMA.MOLL.114459	NMNL	1929-09-03	The Netherlands, Zeeland, Oostkapelle	51.572	3.50855	found dead	http://data.biodiversitydata.nl/naturalis/specimen/ZMA.MOLL.114459
ZMA.MOLL.108502	NMNL	1930	The Netherlands, Zeeland, Oosterschelde	51.5663	3.94896	found dead	http://data.biodiversitydata.nl/naturalis/specimen/ZMA.MOLL.108502
RMNH.MOL.320011	NMNL	1930-06-16	Croatia, Itria, Rovinj	45.1294	13.6866	found dead	http://data.biodiversitydata.nl/naturalis/specimen/RMNH.MOL.320011
ZMA.MOLL.415121	NMNL	1931	France, Ajaccio, Corsica, Pino beach	42.9235	9.35826	found dead	http://data.biodiversitydata.nl/naturalis/specimen/ZMA.MOLL.415121
ZMA.MOLL.108492	NMNL	1930-07-01	The Netherlands, Utrecht, Kolenvoet near Woudenberg	52.1174	5.47995	found dead	http://data.biodiversitydata.nl/naturalis/specimen/ZMA.MOLL.108492
ZMA.MOLL.108570	NMNL	1932-09-01	The Netherlands, Zeeland, Yerseke	51.5191	4.01716	found dead	http://data.biodiversitydata.nl/naturalis/specimen/ZMA.MOLL.108570
ZMA.MOLL.114461	NMNL	1932-09-01	The Netherlands, Zeeland, Yerseke	51.5189	4.01725	unknown	http://data.biodiversitydata.nl/naturalis/specimen/ZMA.MOLL.114461
ZMA.MOLL.108445	NMNL	1933	The Netherlands, North Holland, Bergen aan Zee	52.6561	4.62645	unknown	http://data.biodiversitydata.nl/naturalis/specimen/ZMA.MOLL.108445
ZMA.MOLL.108576	NMNL	1934	The Netherlands, Zeeland, Yerseke	51.5191	4.01716	unknown	http://data.biodiversitydata.nl/naturalis/specimen/ZMA.MOLL.108576
ZMA.MOLL.108559	NMNL	1934-09-25	The Netherlands, Zeeland, Yersche Bank	51.5189	4.01725	unknown	http://data.biodiversitydata.nl/naturalis/specimen/ZMA.MOLL.108559
ZMA.MOLL.112547	NMNL	1934-11-03	The Netherlands, North Holland, Bakkum aan Zee	52.5523	4.60454	found dead	http://data.biodiversitydata.nl/naturalis/specimen/ZMA.MOLL.112547
ZMA.MOLL.108458	NMNL	1935-03-16	The Netherlands, North Holland, Camperduin	52.7185	4.63864	found dead	http://data.biodiversitydata.nl/naturalis/specimen/ZMA.MOLL.108458
ZMA.MOLL.108494	NMNL	1935-04-24	The Netherlands, Zeeland, Noord-Beveland	51.5929	3.64102	found dead	http://data.biodiversitydata.nl/naturalis/specimen/ZMA.MOLL.108494
ZMA.MOLL.108476	NMNL	1935-04-27	The Netherlands, Zeeland, Domburg	51.5505	3.45695	unknown	http://data.biodiversitydata.nl/naturalis/specimen/ZMA.MOLL.108476
ZMA.MOLL.415126	NMNL	1935-08-22	England, Kent, Dover, Stat. 819	51.1112	1.29589	found dead	http://data.biodiversitydata.nl/naturalis/specimen/ZMA.MOLL.415126
ZMA.MOLL.415105	NMNL	1935-08-27	France, Hauts-de-France, near Calais, Stat. 626	50.9628	1.8295	found dead	http://data.biodiversitydata.nl/naturalis/specimen/ZMA.MOLL.415105
ZMA.MOLL.108533	NMNL	1935-09-03	The Netherlands, NorthHolland, Texel	53.1854	4.85608	found dead	http://data.biodiversitydata.nl/naturalis/specimen/ZMA.MOLL.108533
ZMA.MOLL.415127	NMNL	1935-09-03	France, Pas-de-Calais, Stat. 636	51.0143	2.09101	found dead	http://data.biodiversitydata.nl/naturalis/specimen/ZMA.MOLL.415127
ZMA.MOLL.108441	NMNL	1936	The Netherlands, Gelderland, Arnhem	52.0768	5.94611	found dead	http://data.biodiversitydata.nl/naturalis/specimen/ZMA.MOLL.108441
ZMA.MOLL.108483	NMNL	1936	The Netherlands, Zeeland, Grevelingen near Bruinisse	51.6674	4.09568	unknown	http://data.biodiversitydata.nl/naturalis/specimen/ZMA.MOLL.108483
RMNH.MOL.93762	NMNL	1936	The Netherlands, North Holland, Texel, Oosterend	53.0761	4.89402	unknown	http://data.biodiversitydata.nl/naturalis/specimen/RMNH.MOL.93762
ZMA.MOLL.114474	NMNL	1936-02-01	The Netherlands, Zeeland, Grevelingen near Bruinisse	51.6674	4.09568	unknown	http://data.biodiversitydata.nl/naturalis/specimen/ZMA.MOLL.114474
ZMA.MOLL.114473	NMNL	1936-02-01	The Netherlands, Zeeland, Grevelingen near Bruinisse	51.6675	4.09555	unknown	http://data.biodiversitydata.nl/naturalis/specimen/ZMA.MOLL.114473
47056	ZMH	1936-06-15	Italy, Naples	40.7918	14.1638	found dead
ZMA.MOLL.112554	NMNL	1936-08-18	The Netherlands, Zeeland, Yerseke	51.5191	4.01716	found dead	http://data.biodiversitydata.nl/naturalis/specimen/ZMA.MOLL.112554
ZMA.MOLL.108560	NMNL	1937	The Netherlands, Zeeland, Yersche Bank	51.5189	4.01725	unknown	http://data.biodiversitydata.nl/naturalis/specimen/ZMA.MOLL.108560
ZMA.MOLL.114457	NMNL	1937	The Netherlands, Zeeland, Yerseke	51.5191	4.01716	found dead	http://data.biodiversitydata.nl/naturalis/specimen/ZMA.MOLL.114457
ZMA.MOLL.108565	NMNL	1937	The Netherlands, Zeeland, Yerseke	51.5191	4.01716	found dead	http://data.biodiversitydata.nl/naturalis/specimen/ZMA.MOLL.108565
ZMA.MOLL.114470	NMNL	1937-02-28	The Netherlands, North Holland, Bloemendaal	52.4056	4.54191	unknown	http://data.biodiversitydata.nl/naturalis/specimen/ZMA.MOLL.114470
ZMA.MOLL.108513	NMNL	1937-03-31	The Netherlands, South Holland, Limburg	51.9842	4.08105	unknown	http://data.biodiversitydata.nl/naturalis/specimen/ZMA.MOLL.108513
ZMA.MOLL.108480	NMNL	1937-08-15	The Netherlands, Friesland, Island Griend	53.2541	5.24607	unknown	http://data.biodiversitydata.nl/naturalis/specimen/ZMA.MOLL.108480
ZMA.MOLL.108532	NMNL	1937-09-22	The Netherlands, North Holland, Texel	53.1854	4.85608	found dead	http://data.biodiversitydata.nl/naturalis/specimen/ZMA.MOLL.108532
ZMA.MOLL.415109	NMNL	1938	Norway, Rogaland, Stavanger	59	5.67921	unknown	http://data.biodiversitydata.nl/naturalis/specimen/ZMA.MOLL.415109
ZMA.MOLL.114421	NMNL	1938	The Netherlands, Zeeland, Grevelingen	51.7703	3.86332	unknown	http://data.biodiversitydata.nl/naturalis/specimen/ZMA.MOLL.114421
ZMA.MOLL.108497	NMNL	1938	The Netherlands, Zeeland, Oosterschelde	51.5663	3.94896	found dead	http://data.biodiversitydata.nl/naturalis/specimen/ZMA.MOLL.108497
ZMA.MOLL.108556	NMNL	1938	The Netherlands, Zeeland, Westkapelle	51.5502	3.45672	unknown	http://data.biodiversitydata.nl/naturalis/specimen/ZMA.MOLL.108556
ZMA.MOLL.108446	NMNL	1938	The Netherlands, North Holland, Bergen aan Zee	52.6561	4.62645	unknown	http://data.biodiversitydata.nl/naturalis/specimen/ZMA.MOLL.108446
ZMA.MOLL.108449	NMNL	1938	The Netherlands, North Brabant, Bergen op Zoom	51.5115	4.22056	unknown	http://data.biodiversitydata.nl/naturalis/specimen/ZMA.MOLL.108449
ZMA.MOLL.108482	NMNL	1938	The Netherlands, Zeeland, Grevelingen	51.7703	3.86332	found dead	http://data.biodiversitydata.nl/naturalis/specimen/ZMA.MOLL.108482
ZMA.MOLL.108481	NMNL	1938-04-01	The Netherlands, Friesland, Island Griend	53.2542	5.24586	unknown	http://data.biodiversitydata.nl/naturalis/specimen/ZMA.MOLL.108481
ZMA.MOLL.112668	NMNL	1938-09-30	The Netherlands, Friesland, Kornwerderzand	53.0604	5.28109	found dead	http://data.biodiversitydata.nl/naturalis/specimen/ZMA.MOLL.112668
ZMA.MOLL.108544	NMNL	1938-10-05	The Netherlands, Zeeland, Tholen	51.5355	4.22859	unknown	http://data.biodiversitydata.nl/naturalis/specimen/ZMA.MOLL.108544
ZMA.MOLL.114447	NMNL	1938-10-05	The Netherlands, Zeeland, Tholen	51.5355	4.22859	unknown	http://data.biodiversitydata.nl/naturalis/specimen/ZMA.MOLL.114447
ZMA.MOLL.108454	NMNL	1938-11-01	The Netherlands, Zeeland	51.3699	3.36521	found dead	http://data.biodiversitydata.nl/naturalis/specimen/ZMA.MOLL.108454
ZMA.MOLL.415107	NMNL	1939	North Sea, Oestergronden	54.9163	4.04929	unknown	http://data.biodiversitydata.nl/naturalis/specimen/ZMA.MOLL.415107
ZMA.MOLL.114442	NMNL	1939	The Netherlands, North Brabant, Bergen op Zoom	51.5115	4.22056	unknown	http://data.biodiversitydata.nl/naturalis/specimen/ZMA.MOLL.114442
ZMA.MOLL.108451	NMNL	1939-02-28	The Netherlands, Noord Holland, Bloemendaal	52.4056	4.54225	unknown	http://data.biodiversitydata.nl/naturalis/specimen/ZMA.MOLL.108451
ZMA.MOLL.114466	NMNL	May 1939	The Netherlands, Zeeland, Yerseke	51.5191	4.01716	found dead	http://data.biodiversitydata.nl/naturalis/specimen/ZMA.MOLL.114466
ZMA.MOLL.114462	NMNL	1939-09-01	The Netherlands, Zeeland, Yerseke	51.5189	4.01725	found dead	http://data.biodiversitydata.nl/naturalis/specimen/ZMA.MOLL.114462
ZMA.MOLL.108573	NMNL	1939-09-01	The Netherlands, Zeeland, Yerseke	51.5189	4.01725	found dead	http://data.biodiversitydata.nl/naturalis/specimen/ZMA.MOLL.108573
ZMA.MOLL.108437	NMNL	Oct 1939	The Netherlands, North Holland, Amsterdam	52.3472	4.91327	unknown	http://data.biodiversitydata.nl/naturalis/specimen/ZMA.MOLL.108437
ZMA.MOLL.108485	NMNL	1939-11-01	The Netherlands, Zeeland, Grevelingen	51.7703	3.86332	unknown	http://data.biodiversitydata.nl/naturalis/specimen/ZMA.MOLL.108485
ZMA.MOLL.108504	NMNL	1940	The Netherlands, Noord Holland, Buiten-IJ	52.3796	4.91199	found dead	http://data.biodiversitydata.nl/naturalis/specimen/ZMA.MOLL.108504
ZMA.MOLL.108526	NMNL	1941-09-01	The Netherlands, Zeeland, Stavenisse	51.604	4.04277	unknown	http://data.biodiversitydata.nl/naturalis/specimen/ZMA.MOLL.108526
ZMA.MOLL.108567	NMNL	1941-09-01	The Netherlands, Zeeland, Yerseke	51.5191	4.01716	found dead	http://data.biodiversitydata.nl/naturalis/specimen/ZMA.MOLL.108567
ZMA.MOLL.114465	NMNL	1941-09-01	The Netherlands, Zeeland, Stavenisse	51.5988	4.01891	unknown	http://data.biodiversitydata.nl/naturalis/specimen/ZMA.MOLL.114465
ZMA.MOLL.108571	NMNL	1941-09-01	The Netherlands, Zeeland, Yerseke	51.5189	4.01725	unknown	http://data.biodiversitydata.nl/naturalis/specimen/ZMA.MOLL.108571
ZMA.MOLL.114463	NMNL	1941-09-01	The Netherlands, Zeeland, Yerseke	51.5191	4.01716	found dead	http://data.biodiversitydata.nl/naturalis/specimen/ZMA.MOLL.114463
ZMA.MOLL.114449	NMNL	1942	The Netherlands, Zeeland, Westerschelde	51.4543	3.43033	found dead	http://data.biodiversitydata.nl/naturalis/specimen/ZMA.MOLL.114449
ZMA.MOLL.108555	NMNL	1942	The Netherlands, Zeeland, Westerschelde	51.4543	3.43033	found dead	http://data.biodiversitydata.nl/naturalis/specimen/ZMA.MOLL.108555
Mo 96/4	ZMK	1943-04-01	France, Bretagne, Ptc. de Penmarch	47.8417	-4.35127	unknown
Mo 63/15	ZMK	Aug/Sep 1948	Germany, Schleswig-Holstein, North Sea, west coast, Sylt near the Zoological institute in List	55.0208	8.43947	unknown
W 180	MNUL	1948-10-03	Germany, Schleswig-Holstein, Huseum, dyke	54.4659	8.9114	unknown
ZMA.MOLL.114440	NMNL	1949-03-21	The Netherlands, Zeeland, Rammekens	51.4584	3.66248	unknown	http://data.biodiversitydata.nl/naturalis/specimen/ZMA.MOLL.114440
ZMA.MOLL.108536	NMNL	1949-06-01	The Netherlands, Noord Holland, Texel	53.1854	4.85608	unknown	http://data.biodiversitydata.nl/naturalis/specimen/ZMA.MOLL.108536
W 181	MNUL	1949-07-01	Germany, Schleswig-Holstein, Amrum, Wittdün	54.629	8.38458	unknown
ZMA.MOLL.108527	NMNL	1949-08-18	The Netherlands, Zeeland, Terneuzen	51.3428	3.81423	found dead	http://data.biodiversitydata.nl/naturalis/specimen/ZMA.MOLL.108527
ZMA.MOLL.108528	NMNL	1949-08-31	The Netherlands, Zeeland, Terneuzen	51.3428	3.81423	found dead	http://data.biodiversitydata.nl/naturalis/specimen/ZMA.MOLL.108528
ZMA.MOLL.108490	NMNL	1949-10-29	The Netherlands, Noord Holland, IJpolder	52.4689	4.56287	found dead	http://data.biodiversitydata.nl/naturalis/specimen/ZMA.MOLL.108490
ZMA.MOLL.114438	NMNL	1950-06-01	The Netherlands, Zeeland, Kalkbranderij Den Briel	51.9293	4.14403	unknown	http://data.biodiversitydata.nl/naturalis/specimen/ZMA.MOLL.114438
Mo 74/2	ZMK	1950-07-01	Germany, Schleswig-Holstein, North Sea, west coast, Amrum	54.7122	8.35738	found dead
ZMA.MOLL.108516	NMNL	1950-08-26	The Netherlands, Zeeland, Schouwen	51.7174	3.68628	unknown	http://data.biodiversitydata.nl/naturalis/specimen/ZMA.MOLL.108516
ZMA.MOLL.108582	NMNL	1950-08-26	The Netherlands, Zeeland, Zierikzee	51.6673	3.87644	unknown	http://data.biodiversitydata.nl/naturalis/specimen/ZMA.MOLL.108582
ZMA.MOLL.108552	NMNL	1951-04-01	The Netherlands, Zeeland, Vlissingen	51.4395	3.60113	found dead	http://data.biodiversitydata.nl/naturalis/specimen/ZMA.MOLL.108552
ZMA.MOLL.114437	NMNL	1952	The Netherlands, Zeeland, near Terhofstede	51.3383	3.39265	found dead	http://data.biodiversitydata.nl/naturalis/specimen/ZMA.MOLL.114437
27847	SNSD	1952	Nordsee	56.511	3.51562	unknown
ZMA.MOLL.108549	NMNL	1952-03-14	The Netherlands, Zeeland, Vlissingen	51.4395	3.60113	found dead	http://data.biodiversitydata.nl/naturalis/specimen/ZMA.MOLL.108549
Mo 1477	ZMK	1952-09-01	France, Provence-Alpes-Côte d’Azur, St. Maries de la Mér, estuary of the river Rhône	43.451	4.39161	found dead
Mo 1474	ZMK	1952-11-01	Germany, Schleswig-Holstein, Sylt, northern tip of the island	55.0582	8.41631	found dead
RMNH.MOL.320051	NMNL	1953	The Netherlands, South Holland, Bolnes	51.9004	4.57329	unknown	http://data.biodiversitydata.nl/naturalis/specimen/RMNH.MOL.320051
Mo 1472	ZMK	1954-07-01	Denmark, North Jutland County, Hulsig near Skagen, Kattegat	57.666	10.4947	found dead
Mo 1473	ZMK	1954-07-01	Denmark, North Jutland County, Skagen, Skagerrak	57.7311	10.5239	found dead
Mo 1476	ZMK	1954-08-01	Denmark, Thyholm, Limfjord, Oddesund near Odby	56.5897	8.52951	found dead
ZMA.MOLL.125427	NMNL	1954-09-05	The Netherlands, South Holland, Oostvoorne, beach	51.9228	4.03834	unknown	http://data.biodiversitydata.nl/naturalis/specimen/ZMA.MOLL.125427
ZMA.MOLL.108487	NMNL	1954-10-31	The Netherlands, Noord Holland, IJmuiden	52.4403	4.5564	unknown	http://data.biodiversitydata.nl/naturalis/specimen/ZMA.MOLL.108487
ZMA.MOLL.114441	NMNL	1955	The Netherlands, Zeeland, Veere	51.567	3.63778	found dead	http://data.biodiversitydata.nl/naturalis/specimen/ZMA.MOLL.114441
ZMA.MOLL.108512	NMNL	1955-07-23	The Netherlands, Zeeland, Domburg	51.5595	3.50321	unknown	http://data.biodiversitydata.nl/naturalis/specimen/ZMA.MOLL.108512
ZMA.MOLL.108577	NMNL	1958-06-14	The Netherlands, Zeeland, Zandplaat De Hooge Springer	51.4034	3.59491	found dead	http://data.biodiversitydata.nl/naturalis/specimen/ZMA.MOLL.108577
W 183	MNUL	1960	England, Isle of Wight	50.7666	-1.29611	unknown
RMNH.MOL.95500	NMNL	1960-07-01	France, Bretagne, St. Lunaire	48.6353	-2.12432	found dead	http://data.biodiversitydata.nl/naturalis/specimen/RMNH.MOL.95500
47067	ZMH	1960-07-01	Adriatic Sea	41.8551	17.2903	found dead
ZMA.MOLL.108434	NMNL	1961-05-06	The Netherlands, Zeeland, Aardenburg	51.26	3.44053	unknown	http://data.biodiversitydata.nl/naturalis/specimen/ZMA.MOLL.108434
ZMA.MOLL.114454	NMNL	1961-05-06	The Netherlands, Zeeland, Aardenburg	51.26	3.44053	found dead	http://data.biodiversitydata.nl/naturalis/specimen/ZMA.MOLL.114454
ZMA.MOLL.114425	NMNL	1961-06-02	The Netherlands, Zeeland, Grevelingen	51.7703	3.86332	unknown	http://data.biodiversitydata.nl/naturalis/specimen/ZMA.MOLL.114425
47061	ZMH	May 1962	Italy, Pineto, Pescara	42.4637	14.2327	found alive
RMNH.MOL.34063	NMNL	1962-05-30	Italy, Friuli–Venezia Giulia, Grado	45.68	13.3729	unknown	http://data.biodiversitydata.nl/naturalis/specimen/RMNH.MOL.34063
ZMA.MOLL.108522	NMNL	June 1962	The Netherlands, North Holland, Sloterdijk	52.3963	4.86174	unknown	http://data.biodiversitydata.nl/naturalis/specimen/ZMA.MOLL.108522
RGM.812844	NMNL	Oct-Nov 1962	The Netherlands, Zeeland, Ouwerkerk	51.633807	3.93913	unknown	http://data.biodiversitydata.nl/naturalis/specimen/RGM.812844
ZMA.MOLL.222799	NMNL	1963-03-23	The Netherlands, North Holland, Amsterdam	52.3851	4.84484	found dead	http://data.biodiversitydata.nl/naturalis/specimen/ZMA.MOLL.222799
ZMA.MOLL.108439	NMNL	1963-04-01	The Netherlands, North Holland, Amsterdam	52.4298	4.7371	unknown	http://data.biodiversitydata.nl/naturalis/specimen/ZMA.MOLL.108439
ZMA.MOLL.108470	NMNL	1963-04-01	The Netherlands, Zeeland, Domburg	51.5505	3.45695	unknown	http://data.biodiversitydata.nl/naturalis/specimen/ZMA.MOLL.108470
ZMA.MOLL.114458	NMNL	1963-04-01	The Netherlands, Noord Holland, Amsterdam	52.3761	4.90203	unknown	http://data.biodiversitydata.nl/naturalis/specimen/ZMA.MOLL.114458
ZMA.MOLL.108460	NMNL	1963-04-27	The Netherlands, Zeeland, De Kauter near Nieuw Namen	51.2935	4.15585	unknown	http://data.biodiversitydata.nl/naturalis/specimen/ZMA.MOLL.108460
ZMA.MOLL.114467	NMNL	Oct 1963	The Netherlands, Zeeland	51.3708	3.36612	unknown	http://data.biodiversitydata.nl/naturalis/specimen/ZMA.MOLL.114467
2470646	NHML	1964-07-28	England, Essex, Paglesham, Burnham-on-Crouch, River Roach	51.6248	0.815487	unknown	http://data.nhm.ac.uk/object/c5251449-18cb-49cc-8675-18915b536e69
47062	ZMH	1965	Denmark, Oddesund bay	56.5999	8.58803	found dead
47055	ZMH	1966-08-01	Denmark, Klintebjaerg, Odense Fjord	55.4833	10.45	found dead
47068	ZMH	1967	Croatia, Kvarner Bay, Mali Losinj	44.5712	14.4434	found alive
33658	ZMH	1967-04-23	Germany, Schleswig-Holstein, Helgoland, Dune	54.1919	7.9195	unknown
Mo 1356	ZMK	1967-09-21	Italy, Ischia, Porto d’Ischia, zoological Institute, beach with sand, gravel and stones	40.7428	13.9412	found dead
Mo 1151	ZMK	1967-09-22	Italy, Campania, Lago d‘Averno bear Naples, inside of the Jupiter temple ruins	40.8423	14.0776	found dead
Mo 1069	ZMK	1967-09-25	Italy, Sardinia, Cagliari, near the zoological Institute, beach	39.213	9.10715	found dead
Mo 1081	ZMK	1967-09-25	Italy, Sardinia, Cagliari, near the zoological Institute, beach	39.213	9.10715	found dead
Mo 1243	ZMK	1967-09-27	Italy, Sardinia, Cagliari, near the zoological Institute, beach	39.213	9.10715	found dead
Mo 1172	ZMK	1967-10-02	Italy, Sardinia, Nora, sandy beach	38.9906	9.01397	found dead
Mo 1376	ZMK	1967-10-03	Italy, Sardinia, Oristano, sandy beach, “Kjökkenmoddinger” near fisher village	39.9013	8.48754	found dead
Mo 1055	ZMK	1967-10-05	Italy, Sardinia, Cagliari, near the zoological Institute	39.213	9.10715	found dead
47057	ZMH	1968-07-01	Croatia, Pula, Fishing Harbor	44.8667	13.8167	found dead
33668	ZMH	1968-08-01	Germany, Schleswig-Holstein, Amrum	54.7121	8.35763	found dead
Mo 4514	ZMK	1968-09-01	France, Gironde, Cap Ferret	44.6628	-1.25931	unknown
Mo 4541	ZMK	1968-09-01	France, Gironde, Cap Ferret	44.6628	-1.25931	unknown
Mo 4542	ZMK	1968-09-01	France, Gironde, Cap Ferret	44.6628	-1.25931	unknown
Mo 4540	ZMK	1968-09-06	France, Gironde, Arcachon, Le Moulleau	44.6472	-1.19931	unknown
ZMA.MOLL.108562	NMNL	1969	The Netherlands, Zeeland, Yerseke	51.5191	4.01716	found dead	http://data.biodiversitydata.nl/naturalis/specimen/ZMA.MOLL.108562
ZMA.MOLL.2503672	NMNL	1970-01-01	The Netherlands, North Brabant, Bergen-op-Zoom	51.5115	4.22056	found dead	http://data.biodiversitydata.nl/naturalis/specimen/ZMA.MOLL.2503672
ZMA.MOLL.2503673	NMNL	1970-01-01	The Netherlands, North Holland, Texel	53.1854	4.85608	found dead	http://data.biodiversitydata.nl/naturalis/specimen/ZMA.MOLL.2503673
ZMA.MOLL.2503676	NMNL	1970-01-01	The Netherlands, North Brabant, Bergen-op-Zoom	51.5115	4.22056	unknown	http://data.biodiversitydata.nl/naturalis/specimen/ZMA.MOLL.2503676
ZMA.MOLL.114460	NMNL	1970-01-01	The Netherlands, Zeeland, Vlissingen	51.4395	3.60113	unknown	http://data.biodiversitydata.nl/naturalis/specimen/ZMA.MOLL.114460
ZMA.MOLL.2503674	NMNL	1970-01-01	The Netherlands, North Holland, Texel	53.1854	4.85608	unknown	http://data.biodiversitydata.nl/naturalis/specimen/ZMA.MOLL.2503674
ZMA.MOLL.2503678	NMNL	1970-01-01	The Netherlands, North Holland, Texel	53.1854	4.85608	unknown	http://data.biodiversitydata.nl/naturalis/specimen/ZMA.MOLL.2503678
ZMA.MOLL.108550	NMNL	1970-01-01	The Netherlands, Zeeland, Vlissingen	51.4395	3.60113	found dead	http://data.biodiversitydata.nl/naturalis/specimen/ZMA.MOLL.108550
ZMA.MOLL.2503701	NMNL	1970-01-01	The Netherlands, North Brabant, Bergen-op-Zoom	51.5115	4.22056	unknown	http://data.biodiversitydata.nl/naturalis/specimen/ZMA.MOLL.2503701
ZMA.MOLL.114468	NMNL	1970-07-10	The Netherlands, Friesland, Terschelling	53.352	5.15167	unknown	http://data.biodiversitydata.nl/naturalis/specimen/ZMA.MOLL.114468
Mo 6110	ZMK	1971	Sweden, Bohuslän	59.0897	11.2346	found dead
Mo 6114	ZMK	1971	Germany, Schleswig-Holstein, Sylt, Hörnum	54.7936	8.295	found dead
87482	ZMH	1972	Greece, Malacondas, Eubbda	38.4	23.7667	found alive
RMNH.MOL.95432	NMNL	1972	North Sea, Klaverbank	52.513	5.07005	unknown	http://data.biodiversitydata.nl/naturalis/specimen/RMNH.MOL.95432
87130	ZMH	1973-04-14	Italy, Muggia, south of Trieste	45.6042	13.7675	found alive
87122	ZMH	1973-04-15	Croatia, Porec	45.2303	13.5983	found dead
Mo 12/11	ZMK	ca. 1974	Germany, Schleswig-Holstein, North Sea, west coast	55.056	8.41318	found dead
ZMA.MOLL.108489	NMNL	1975-03-01	The Netherlands, North Holland, IJmuiden port	52.4638	4.53231	found dead	http://data.biodiversitydata.nl/naturalis/specimen/ZMA.MOLL.108489
Biv 0496	ZSRO	1975-07-10	Bulgaria, Wesseli, stony coast	42.3288	27.7424	found alive
II-E/8238	DMM	1976-03-01	Germany, Mecklenburg-Vorpommern, Greifswald near Loissin	54.0944	13.494	found dead
Biv 0497	ZSRO	1977-06-11	Bulgaria, Burgas, Lozenec	42.2225	27.787	found dead
Biv 0498	ZSRO	14.07.1997 & 20.07.1997	Sweden, Västra Götaland County, Fiskgebäckskil, Gulmarnfjord	58.2476	11.4537	unknown
ZMA.MOLL.112557	NMNL	1977-07-18	The Netherlands, Friesland, Terschelling	53.352	5.15167	found dead	http://data.biodiversitydata.nl/naturalis/specimen/ZMA.MOLL.112557
Biv 0515	ZSRO	23.08.1997 - 06.09.1997	Spain, Ibiza, beaches „Cala Lleyna” and “Cala Nova”	39.0209	1.59387	found dead
II-E/9107	DMM	1981-05-17	Denmark, Syddanmark, Fanø, Rømø, washed ashore	55.4686	8.35561	found dead
ZMA.MOLL.105954	NMNL	1982-04-01	France , Occitania, Languedoc-Roussillon, La Tamarissiere	43.2881	3.43726	found dead	http://data.biodiversitydata.nl/naturalis/specimen/ZMA.MOLL.105954
47063	ZMH	1982-07-01	France, Bretagne	48.6431	-1.58682	found dead
ZMA.MOLL.112555	NMNL	1982-07-29	The Netherlands, Friesland, Terschelling	53.352	5.15167	found dead	http://data.biodiversitydata.nl/naturalis/specimen/ZMA.MOLL.112555
ZMA.MOLL.112671	NMNL	1982-08-11	The Netherlands, Friesland, Terschelling	53.352	5.15167	unknown	http://data.biodiversitydata.nl/naturalis/specimen/ZMA.MOLL.112671
309308	SMF	1984-08-07	Sweden, in front of Stavanger	58.9794	5.75954	unknown
309392	SMF	1984-08-13	Germany, Schleswig-Holstein, Helgoland, “Tiefe Rinne“	54.1337	7.88593	unknown
ZMA.MOLL.15077	NMNL	1985-06-18	France, Bretagne, Les Rosaires, sta. pel85/18	48.5679	-2.76493	found dead	http://data.biodiversitydata.nl/naturalis/specimen/ZMA.MOLL.15077
Biv 0507	ZSRO	1986-04-01	Germany, Schleswig-Holstein, Amrum	54.7126	8.35757	unknown
Biv 3166	ZSRO	1986-04-01	Germany, Schleswig-Holstein, Amrum	54.7126	8.35757	unknown
Biv 3167	ZSRO	1987/1988	Bulgaria, Black Sea coast	43.7226	28.5961	found dead
7866	ZMH	1989	France, Le Dramont	43.4164	6.8371	found dead
ZMA.MOLL.126064	NMNL	1990-09-01	The Netherlands, Zeeland, Cadzand, beach	51.369	3.36679	found dead	http://data.biodiversitydata.nl/naturalis/specimen/ZMA.MOLL.126064
Biv 0516	ZSRO	21.04.1992 & 23.04.1992	Turkey, Mugla, beach between Iztuzu and Dalyanagzi	36.8009	28.602	found dead
II-E/12234	DMM	1994-04-24	Denmark, Syddanmark, Fanø, wadden shore	55.4688	8.35915	found dead
II-E/12244	DMM	1994-04-24	Denmark, Syddanmark, Rømø	55.211	8.51355	found dead
II-E/15037	DMM	May-Sep 1994	Norway, Nordland, Moskenesøy, shore near Fredwang, Lofoten	67.8253	12.809	found dead
ZMA.MOLL.90457	NMNL	1994-08-11	The Netherlands, Zeeland, Bruinisse	52.6167	4.6333	unknown	http://data.biodiversitydata.nl/naturalis/specimen/ZMA.MOLL.90457
II-E/12539	DMM	1995-07-28	Germany, Schleswig-Holstein, Helgoland, “Tiefe Rinne“	54.1564	7.92946	found dead
47053	ZMH	1997	Germany, Niedersachsen, Cuxhaven, Elbe estuary	53.8918	8.68804	found dead
