# Supplementary material for: Coming and going – Historical distributions of the European oyster Ostrea edulis Linnaeus, 1758 and the introduced slipper limpet Crepidula fornicata Linnaeus, 1758 in the North Sea
Source: PLoS One. 2019 Oct 24;14(10):e0224249. doi: 10.1371/journal.pone.0224249 (PMC6812771; doi:10.1371/journal.pone.0224249)
Supplement: S3 Table — (XLSX) [file pone.0224249.s005.xlsx]

## Sheet: Ostrea edulis 21st century
catalogue number	facility	sampling date	location	latitude	longitude	status	Publication
ZMA.MOLL.108558	NMNL	2000-07-27	The Netherlands, Zeeland, Yersche Bank	51.5189	4.01725	unknown	http://data.biodiversitydata.nl/naturalis/specimen/ZMA.MOLL.108558
Biv 3169	ZSRO	2002	Germany, Niedersachsen, Juist, North Sea	53.6627	6.85092	found dead
ZMA.MOLL.13619	NMNL	2002-05-04	Greece, North Aegean, Lesbos, Skala Kalloni	39.1971	26.1721	unknown	http://data.biodiversitydata.nl/naturalis/specimen/ZMA.MOLL.13619
132136	ZMH	2003-08-01	Italy, Tortoli, beach	39.9167	9.68333	found dead
132134	ZMH	2007-07-01	France, Frontignan, beach	43.4333	3.76667	found dead
132137	ZMH	2007-07-01	France, Port-la-Nouvelle, beach	43	3.05	found dead
	ZMH	2008-02-01	Germany, Schleswig-Holstein, Sylt, List, beach	55.0167	8.43333	found dead
Biv 3173	ZSRO	2008-02-11	Germany, Niedersachsen, Wangerooge	53.7871	7.846	found dead
132135	ZMH	2008-07-01	Italy, Lignano, beach	45.6667	13.1167	found dead
IM 2009-7744	MNHN	2009	North-East Atlantic coast	48.2537	-7.97187	unknown	http://coldb.mnhn.fr/catalognumber/mnhn/im/2009-7744
IM 2009-7745	MNHN	2009	North-East Atlantic coast	48.2537	-7.97187	unknown	http://coldb.mnhn.fr/catalognumber/mnhn/im/2009-7745
IM 2009-7746	MNHN	2009	North-East Atlantic coast	48.2537	-7.97187	unknown	http://coldb.mnhn.fr/catalognumber/mnhn/im/2009-7746
Biv 3227	ZSRO	May 2009	Spain, Atlantic coast	37.162	-7.38564	found dead
Biv 4282	ZSRO	2009-10-04	Italy, Friaul, Grado, drift line	45.6819	13.4386	found dead
RMNH.MOL.128149	NMNL	2010-08-22	Ukraine, Black Sea, Autonomous Republic of Crimea, Evpatoria district, Popivka	45.2963	33.0288	unknown	http://data.biodiversitydata.nl/naturalis/specimen/RMNH.MOL.128149
IM 2009-30856	MNHN	2012-2013	Africa, Tunisia, island Djerba, Golf of Gabes	33.6992	10.7608	unknown	http://coldb.mnhn.fr/catalognumber/mnhn/im/2009-30856
IM 2009-30857	MNHN	2012-2013	Africa, Tunisia, island Djerba, Golf of Gabes	33.6992	10.7608	unknown	http://coldb.mnhn.fr/catalognumber/mnhn/im/2009-30857
Mo 8801	ZMK	2017-10-08	Germany, Schleswig-Holstein, Baltic Sea, short beach between Bülk and Strande, beneath sand on the shore	54.4445	10.1815	found dead
Mo 8802/5	ZMK	13.-18.08.2017	France, Hérault, beach between Sète and Marseillan, beach wall separating the lake from the Sea, infront of camping site	43.334	3.57566	found dead
Mo 8803/2	ZMK	13.-18.08.2017	France, Hérault, beach between Sète and Marseillan, beach wall separating the lake from the Sea, infront of camping site	43.334	3.57566	found dead
Mo 8900/19	ZMK	16.-19.10.2017	Germany, Schleswig-Holstein, Sylt, Rantum, beach infront of the Café “Strandmuschel”, drift line at low tide	54.8472	8.28567	found dead
Mo 8901/1	ZMK	16.-19.10.2017	Germany, Schleswig-Holstein, Sylt, Rantum, beach infront of the Café “Strandmuschel”, drift line at low tide	54.8472	8.28567	found dead
Mo 8934/1	ZMK	2017-09-18	Ireland, Connacht, Galway, bought from Kelly Oysters	53.1913	-8.95492	found alive
Mo 8935/1	ZMK	2017-09-18	Ireland, Connacht, Galway, bought from Kelly Oysters	53.1913	-8.95492	found alive
Mo 8936/1	ZMK	2017-09-18	Ireland, Connacht, Galway, bought from Kelly Oysters	53.1913	-8.95492	found alive
Mo 8937/1	ZMK	2017-09-18	Ireland, Connacht, Galway, bought from Kelly Oysters	53.1913	-8.95492	found alive
Mo 8938/1	ZMK	2017-09-18	Ireland, Connacht, Galway, bought from Kelly Oysters	53.1913	-8.95492	found alive
Mo 8939/1	ZMK	2017-09-18	Ireland, Connacht, Galway, bought from Kelly Oysters	53.1913	-8.95492	found alive
Mo 8940/1	ZMK	2017-09-18	Ireland, Connacht, Galway, bought from Kelly Oysters	53.1913	-8.95492	found alive
Mo 8941/1	ZMK	2017-09-18	Ireland, Connacht, Galway, bought from Kelly Oysters	53.1913	-8.95492	found alive
Mo 9075/20	ZMK	2018-04-16	Germany, Schleswig-Holstein, „Hoyerstief“ oyster bed	55.0112	8.50353	found dead
Biv 4507	ZSRO	2018-10-01	Denmark, Jutland, island Fur, Limfjord	56.8407	8.98595	unknown
