# Supplementary material for: Coming and going – Historical distributions of the European oyster Ostrea edulis Linnaeus, 1758 and the introduced slipper limpet Crepidula fornicata Linnaeus, 1758 in the North Sea
Source: PLoS One. 2019 Oct 24;14(10):e0224249. doi: 10.1371/journal.pone.0224249 (PMC6812771; doi:10.1371/journal.pone.0224249)
Supplement: S4 Table — (XLSX) [file pone.0224249.s006.xlsx]

## Sheet: Crepidula fornicata 20th centur
catalogue number	facility	sampling date	location	latitude	longitude	Publication
ZMA.MOLL.337339	NMNL	1905-04-21	Germany, Niedersachsen, Juist	53.661	6.85229	http://data.biodiversitydata.nl/naturalis/specimen/ZMA.MOLL.337339
ZMA.MOLL.114323	NMNL	1905-04-22	The Netherlands, North Holland, Den Oever	52.9349	4.9996	http://data.biodiversitydata.nl/naturalis/specimen/ZMA.MOLL.114323
ZMA.MOLL.114330	NMNL	1905-04-22	The Netherlands, North Holland, Den Oever	52.9349	4.9996	http://data.biodiversitydata.nl/naturalis/specimen/ZMA.MOLL.114330
ZMA.MOLL.114290	NMNL	1905-04-22	The Netherlands, Zeeland, Terneuzen	51.3428	3.81423	http://data.biodiversitydata.nl/naturalis/specimen/ZMA.MOLL.114290
ZMA.MOLL.114320	NMNL	1905-04-22	The Netherlands, North Holland, Den Oever	52.9349	4.9996	http://data.biodiversitydata.nl/naturalis/specimen/ZMA.MOLL.114320
RMNH.MOL.71442	NMNL	1905-05-01	The Netherlands, South Holland, between Zandvoort and Noordwijk	52.2448	4.42647	http://data.biodiversitydata.nl/naturalis/specimen/RMNH.MOL.71442
ZMA.MOLL.127413	NMNL	1905-05-08	The Netherlands, North Holland, Texel	53.0761	4.89402	http://data.biodiversitydata.nl/naturalis/specimen/ZMA.MOLL.127413
ZMA.MOLL.114272	NMNL	1905-05-23	The Netherlands, Zeeland, Domburg	51.5505	3.45695	http://data.biodiversitydata.nl/naturalis/specimen/ZMA.MOLL.114272
ZMA.MOLL.114275	NMNL	1905-06-15	The Netherlands, Zeeland, Grevelingenmeer	51.7703	3.86332	http://data.biodiversitydata.nl/naturalis/specimen/ZMA.MOLL.114275
ZMA.MOLL.337308	NMNL	1920	Wales, Anglesey, Irish Sea	53.43	-4.42576	http://data.biodiversitydata.nl/naturalis/specimen/ZMA.MOLL.337308
ZMA.MOLL.114306	NMNL	1926-09-05	The Netherlands, North Holland, Camperduin-Petten	52.7706	4.66248	http://data.biodiversitydata.nl/naturalis/specimen/ZMA.MOLL.114306
ZMA.MOLL.114313	NMNL	1927-06-01	The Netherlands, South Holland, Den Haag, south Gravenhage	52.0608	4.28256	http://data.biodiversitydata.nl/naturalis/specimen/ZMA.MOLL.114313
3500869	NHML	1928 - 1873	Africa	34.7164	-6.45183	https://doi.org/10.5519/0002965
RMNH.MOL.180644	NMNL	14.09.1929 - 15.09.1929	England, Essex, Davercourt	51.9233	1.26963	http://data.biodiversitydata.nl/naturalis/specimen/RMNH.MOL.180644
ZMA.MOLL.2503658	NMNL	Dec 1929	The Netherlands, Zeeland, Yerseke	51.5189	4.01725	http://data.biodiversitydata.nl/naturalis/specimen/ZMA.MOLL.2503658
RMNH.MOL.180636	NMNL	1930	England, Island Wight, Ryde	50.7467	-1.24267	http://data.biodiversitydata.nl/naturalis/specimen/RMNH.MOL.180636
2680033	NHML	1930-08-01	Europe	52.2584	4.3747	https://doi.org/10.5519/0002965
RMNH.MOL.180660	NMNL	1930-08-15	England, Essex, Davercourt Bay	51.9233	1.26963	http://data.biodiversitydata.nl/naturalis/specimen/RMNH.MOL.180660
ZMA.MOLL.114274	NMNL	1930-11-01	The Netherlands, Zeeland, Oosterschelde	51.5663	3.94896	http://data.biodiversitydata.nl/naturalis/specimen/ZMA.MOLL.114274
ZMA.MOLL.337317	NMNL	1930-11-05	England, Eling near Southampton	50.91	-1.4823	http://data.biodiversitydata.nl/naturalis/specimen/ZMA.MOLL.337317
RMNH.MOL.180672	NMNL	27.07.1931 - 01.08.1931	England, Hampshire, the Solent, Warren beach	50.7672	-1.41584	http://data.biodiversitydata.nl/naturalis/specimen/RMNH.MOL.180672
ZMA.MOLL.114278	NMNL	1933-02-01	The Netherlands, Zeeland, Yerseke	51.5189	4.01725	http://data.biodiversitydata.nl/naturalis/specimen/ZMA.MOLL.114278
ZMA.MOLL.114279	NMNL	1933-02-01	The Netherlands, Zeeland, Zierikzee	51.6673	3.87678	http://data.biodiversitydata.nl/naturalis/specimen/ZMA.MOLL.114279
ZMA.MOLL.114260	NMNL	1933-06-22	The Netherlands, Zeeland, Yerseke	51.5189	4.01725	http://data.biodiversitydata.nl/naturalis/specimen/ZMA.MOLL.114260
3521197	NHML	1934-07-01	Europe	52.2584	4.3747	https://doi.org/10.5519/0002965
RMNH.MOL.180632	NMNL	22.04.1935 - 26.04.1935	England, Dorset, Bridport beach	50.7152	-2.78294	http://data.biodiversitydata.nl/naturalis/specimen/RMNH.MOL.180632
ZMA.MOLL.114287	NMNL	May 1935	The Netherlands, Zeeland, Westenschouwen	51.6745	3.69568	http://data.biodiversitydata.nl/naturalis/specimen/ZMA.MOLL.114287
ZMA.MOLL.114270	NMNL	1935-07-01	The Netherlands, Zeeland, Bruinisse	51.6674	4.09568	http://data.biodiversitydata.nl/naturalis/specimen/ZMA.MOLL.114270
ZMA.MOLL.114261	NMNL	Oct 1935	The Netherlands, Zeeland, Yerseke	51.5189	4.01725	http://data.biodiversitydata.nl/naturalis/specimen/ZMA.MOLL.114261
RMNH.MOL.180630	NMNL	1936-01-01	England, Eddystone near Plymouth	50.18	-4265	http://data.biodiversitydata.nl/naturalis/specimen/RMNH.MOL.180630
ZMA.MOLL.114283	NMNL	1936-02-01	The Netherlands, Zeeland, Bruinisse	51.6674	4.09568	http://data.biodiversitydata.nl/naturalis/specimen/ZMA.MOLL.114283
ZMA.MOLL.114262	NMNL	1936-08-17	The Netherlands, Zeeland, Yerseke	51.5189	4.01725	http://data.biodiversitydata.nl/naturalis/specimen/ZMA.MOLL.114262
ZMA.MOLL.114296	NMNL	1936-09-01	The Netherlands, Zeeland, Yerseke	51.5191	4.01716	http://data.biodiversitydata.nl/naturalis/specimen/ZMA.MOLL.114296
ZMA.MOLL.159393	NMNL	1937-08-28	The Netherlands, Zeeland, Yerseke	51.5189	4.01725	http://data.biodiversitydata.nl/naturalis/specimen/ZMA.MOLL.159393
ZMA.MOLL.114284	NMNL	1938-02-01	The Netherlands, Zeeland, Vlissingen beach	51.4395	3.60113	http://data.biodiversitydata.nl/naturalis/specimen/ZMA.MOLL.114284
ZMA.MOLL.114259	NMNL	May 1938	The Netherlands, Zeeland, Veere	51.5189	4.01725	http://data.biodiversitydata.nl/naturalis/specimen/ZMA.MOLL.114259
ZMA.MOLL.114276	NMNL	1938-05-04	The Netherlands, Zeeland, Veere	51.5641	3.63976	http://data.biodiversitydata.nl/naturalis/specimen/ZMA.MOLL.114276
ZMA.MOLL.114326	NMNL	1938-09-26	The Netherlands, North Holland, Den Oever	52.9349	4.9996	http://data.biodiversitydata.nl/naturalis/specimen/ZMA.MOLL.114326
RMNH.MOL.180637	NMNL	1939-04-14	England, Dorset, Studland beach	50.6797	-1.94941	http://data.biodiversitydata.nl/naturalis/specimen/RMNH.MOL.180637
RMNH.MOL.180631	NMNL	1939-04-16	England, Dorset, Swanage beach	50.6446	-1.94618	http://data.biodiversitydata.nl/naturalis/specimen/RMNH.MOL.180631
RMNH.MOL.180653	NMNL	1939-04-20	England, Dorset, Studland beach	50.6797	-1.94941	http://data.biodiversitydata.nl/naturalis/specimen/RMNH.MOL.180653
ZMA.MOLL.114263	NMNL	1940-11-01	The Netherlands, Zeeland, Yerseke, Oosterschelde	51.5191	4.01716	http://data.biodiversitydata.nl/naturalis/specimen/ZMA.MOLL.114263
ZMA.MOLL.114317	NMNL	1941-01-25	The Netherlands, North Holland, Zandvoort	52.2448	4.42647	http://data.biodiversitydata.nl/naturalis/specimen/ZMA.MOLL.114317
Mo 8887/11	ZMK	1943-04-01	France, Bretagne, Penmarch	47.8417	-4.35127
ZMA.MOLL.114286	NMNL	1943-07-01	The Netherlands, Zeeland, Ouwerkerk	51.633807	3.93913	http://data.biodiversitydata.nl/naturalis/specimen/ZMA.MOLL.114286
ZMA.MOLL.114285	NMNL	1946-10-08	The Netherlands, Zeeland, Schakerloo	51.8907	4.32435	http://data.biodiversitydata.nl/naturalis/specimen/ZMA.MOLL.114285
Mo 8897/1	ZMK	1948-07-01	Germany, Schleswig-Holstein, Sylt, Königshafen	55.0582	8.41631
Mo 8886/6	ZMK	1948-08-01	Germany, Schleswig-Holstein, Sylt, beach on northern tip	55.0585	8.41681
Mo 8893/6	ZMK	1948-08-01	Germany, Schleswig-Holstein, Sylt, List	55.0582	8.41631
Mo 807/13	ZMK	Aug/Sep 1948	Germany, Schleswig-Holstein, Sylt, Königshafen	55.0582	8.41631
Mo 8883/11	ZMK	Aug/Sep 1948	Germany, Schleswig-Holstein, Sylt, Königshafen	55.0582	8.41631
Mo 8888/29	ZMK	Aug/Sep 1948	Germany, Schleswig-Holstein, Sylt, southern beach on northern tip	55.0459	8.39579
RMNH.MOL.5009348	NMNL	1948-09-01	The Netherlands, Friesland, Schiermonnikoog	53.4612	6.1135	http://data.biodiversitydata.nl/naturalis/specimen/RMNH.MOL.5009348
Mo 8898/1	ZMK	1948-09-01	Germany, Schleswig-Holstein, Sylt, Königshafen/List	55.0582	8.41631
2448552	NHML	1948-09-25	Europe	52.2584	4.3747	https://doi.org/10.5519/0002965
RMNH.MOL.5005343	NMNL	1949	The Netherlands, South Holland, Scheweningen	52.0824	4.23392	http://data.biodiversitydata.nl/naturalis/specimen/RMNH.MOL.5005343
ZMA.MOLL.114294	NMNL	1949-07-01	The Netherlands, Zeeland, Rammekens	51.4584	3.66248	http://data.biodiversitydata.nl/naturalis/specimen/ZMA.MOLL.114294
ZMA.MOLL.114291	NMNL	1949-08-18	The Netherlands, Zeeland, Terneuzen	51.3428	3.81423	http://data.biodiversitydata.nl/naturalis/specimen/ZMA.MOLL.114291
ZMA.MOLL.114282	NMNL	1949-08-20	The Netherlands, Zeeland, coast near Othene	51.3349	3.85741	http://data.biodiversitydata.nl/naturalis/specimen/ZMA.MOLL.114282
ZMA.MOLL.114273	NMNL	1949-08-26	The Netherlands, Zeeland, Domburg	51.5505	3.45695	http://data.biodiversitydata.nl/naturalis/specimen/ZMA.MOLL.114273
ZMA.MOLL.114268	NMNL	1949-08-31	The Netherlands, Zeeland, Terneuzen	51.3428	3.81423	http://data.biodiversitydata.nl/naturalis/specimen/ZMA.MOLL.114268
ZMA.MOLL.114312	NMNL	1950-07-18	The Netherlands, Friesland, Terschelling	53.352	5.15167	http://data.biodiversitydata.nl/naturalis/specimen/ZMA.MOLL.114312
ZMA.MOLL.114300	NMNL	1950-07-19	The Netherlands, North Holland, Texel	53.0761	4.89402	http://data.biodiversitydata.nl/naturalis/specimen/ZMA.MOLL.114300
RMNH.MOL.180650	NMNL	03.08.1950 - 16.08.1950	Spain, Girona, Cadaques Bay	42.2744	3.28073	http://data.biodiversitydata.nl/naturalis/specimen/RMNH.MOL.180650
RMNH.MOL.180647	NMNL	1950-08-07	Spain, Girona, Playa d‘en Pere Fet near Cadaques	42.2855	3.28501	http://data.biodiversitydata.nl/naturalis/specimen/RMNH.MOL.180647
ZMA.MOLL.114265	NMNL	1950-08-26	The Netherlands, Zeeland, Kistersinlaag, south of Schouwen	51.6806	3.83583	http://data.biodiversitydata.nl/naturalis/specimen/ZMA.MOLL.114265
ZMA.MOLL.114295	NMNL	1950-08-28	The Netherlands, Zeeland, Zierikzee, Kistersinlaag	51.6806	3.83583	http://data.biodiversitydata.nl/naturalis/specimen/ZMA.MOLL.114295
ZMA.MOLL.114292	NMNL	1951-01-01	The Netherlands, Zeeland, Wemeldinge	51.5275	3.9721	http://data.biodiversitydata.nl/naturalis/specimen/ZMA.MOLL.114292
2448553	NHML	1951-03-24	Europe	52.2584	4.3747	https://doi.org/10.5519/0002965
Mo 8858/3	ZMK	Mar/Apr 1951	Germany, Schleswig-Holstein, Föhr, beach	54.7555	8.53346
ZMA.MOLL.114277	NMNL	1953-08-01	The Netherlands, Zeeland, Schelphoek	51.701	3.79361	http://data.biodiversitydata.nl/naturalis/specimen/ZMA.MOLL.114277
ZMA.MOLL.114289	NMNL	1953-11-01	The Netherlands, Zeeland, Zierikzee, on mussel beds at Boerenweg	51.6673	3.87678	http://data.biodiversitydata.nl/naturalis/specimen/ZMA.MOLL.114289
RMNH.MOL.71443	NMNL	1954-05-16	The Netherlands, Friesland, north west of Nieuwe Bildtzijl near Ferwerderadiel, Noorderleeg	53.3196	5.72661	http://data.biodiversitydata.nl/naturalis/specimen/RMNH.MOL.71443
Mo 8895/5	ZMK	1954-06-01	Germany, Schleswig-Holstein, Sylt, northern tip	55.0585	8.41681
RMNH.MOL.71441	NMNL	1954-07-19	The Netherlands, Friesland, Terschelling, near Hoorn	53.352	5.15167	http://data.biodiversitydata.nl/naturalis/specimen/RMNH.MOL.71441
ZMA.MOLL.114318	NMNL	1954-08-12	The Netherlands, Groningen, Rottumeroog	53.5392	6.56481	http://data.biodiversitydata.nl/naturalis/specimen/ZMA.MOLL.114318
ZMA.MOLL.125418	NMNL	1955-09-22	The Netherlands, South Holland, Oostvoorne, beach	51.9228	4.03834	http://data.biodiversitydata.nl/naturalis/specimen/ZMA.MOLL.125418
2754545	NHML	1956-04-02	Europe	52.2584	4.3747	https://doi.org/10.5519/0002965
ZMA.MOLL.125495	NMNL	1957-07-25	The Netherlands, South Holland, Oostvoorne	51.9228	4.03834	http://data.biodiversitydata.nl/naturalis/specimen/ZMA.MOLL.125495
31468	SNSD	1957-12-04	Germany, Schleswig-Holstein, Föhr, Wyk	54.6804	8.53641
ZMA.MOLL.114281	NMNL	1959-06-01	The Netherlands, Zeeland, Wemeldinge	51.5275	3.9721	http://data.biodiversitydata.nl/naturalis/specimen/ZMA.MOLL.114281
ZMA.MOLL.114301	NMNL	1960-08-01	The Netherlands, Friesland, Terschelling	53.352	5.15167	http://data.biodiversitydata.nl/naturalis/specimen/ZMA.MOLL.114301
RMNH.MOL.5009347	NMNL	1961-07-01	The Netherlands, Groningen, Eems near Tolen	53.4078	6.87442	http://data.biodiversitydata.nl/naturalis/specimen/RMNH.MOL.5009347
ZMA.MOLL.114303	NMNL	1961-07-01	The Netherlands, Friesland, Terschelling, Oosterend	53.352	5.15167	http://data.biodiversitydata.nl/naturalis/specimen/ZMA.MOLL.114303
2464165	NHML	1961-08-24	Europe	52.2584	4.3747	https://doi.org/10.5519/0002965
ZMA.MOLL.126913	NMNL	1962-06-08	The Netherlands, North Holland, IJmuiden	52.4403	4.5564	http://data.biodiversitydata.nl/naturalis/specimen/ZMA.MOLL.126913
ZMA.MOLL.114324	NMNL	1964-07-01	The Netherlands, North Holland, Zandvoort	52.4003	4.53871	http://data.biodiversitydata.nl/naturalis/specimen/ZMA.MOLL.114324
2464166	NHML	1964-07-28	Europe	52.2584	4.3747	https://doi.org/10.5519/0002965
2464167	NHML	1964-07-30	Europe	52.2584	4.3747	https://doi.org/10.5519/0002965
5772	DMM	11.10.1968 - 16.10.1968	Sweden, Bohuslän, Kristineberg, zoolog. station, Gullmarnfjord	58.2497	11.4444
ZMA.MOLL.125555	NMNL	1969-05-28	The Netherlands, Friesland, Schiermonnikoog	53.4612	6.1135	http://data.biodiversitydata.nl/naturalis/specimen/ZMA.MOLL.125555
ZMA.MOLL.114307	NMNL	May 1970	The Netherlands, Zeeland	51.3708	3.36612	http://data.biodiversitydata.nl/naturalis/specimen/ZMA.MOLL.114307
ZMA.MOLL.114319	NMNL	1970-08-29	The Netherlands, North Holland, Ijmuiden, south pier	52.4403	4.5564	http://data.biodiversitydata.nl/naturalis/specimen/ZMA.MOLL.114319
ZMA.MOLL.114280	NMNL	1973-07-01	The Netherlands, North Holland, Texel	53.0761	4.89402	http://data.biodiversitydata.nl/naturalis/specimen/ZMA.MOLL.114280
ZMA.MOLL.114304	NMNL	1974-02-28	The Netherlands, North Holland, Texel	53.0761	4.89402	http://data.biodiversitydata.nl/naturalis/specimen/ZMA.MOLL.114304
ZMA.MOLL.114322	NMNL	1974-09-29	The Netherlands, North Holland, Texel	53.0761	4.89402	http://data.biodiversitydata.nl/naturalis/specimen/ZMA.MOLL.114322
ZMA.MOLL.114298	NMNL	1975-07-01	The Netherlands, Friesland, Terschelling, Lies, shore	53.3774	5.32376	http://data.biodiversitydata.nl/naturalis/specimen/ZMA.MOLL.114298
ZMA.MOLL.2286479	NMNL	1975-07-08	France, Normandie, Cotentin, La Madeleine	49.4086	-1.16681	http://data.biodiversitydata.nl/naturalis/specimen/ZMA.MOLL.2286479
ZMA.MOLL.114258	NMNL	1975-11-01	The Netherlands, Zeeland, Yerseke, between oysters	51.5189	4.01725	http://data.biodiversitydata.nl/naturalis/specimen/ZMA.MOLL.114258
ZMA.MOLL.35299	NMNL	1976-07-01	England, Island Herm	49.4836	-2.44815	http://data.biodiversitydata.nl/naturalis/specimen/ZMA.MOLL.35299
ZMA.MOLL.114271	NMNL	1976-12-14	The Netherlands, Zeeland, Wemelding lock, Oosterschelde	51.5216	4.00334	http://data.biodiversitydata.nl/naturalis/specimen/ZMA.MOLL.114271
RMNH.MOL.110068	NMNL	1977-02-05	The Netherlands, Zeeland, Schouwen-Duivenland, 3.5km west of Kerkwerve Flauwers	51.6778	3.85743	http://data.biodiversitydata.nl/naturalis/specimen/RMNH.MOL.110068
308711	SMF	1977-06-22	Germany, Schleswig-Holstein, Helgoland, „Tiefe Rinne“, FS-30 Ku	54.1564	7.92946
ZMA.MOLL.114329	NMNL	1977-07-18	The Netherlands, Friesland, Terschelling	53.352	5.15167	http://data.biodiversitydata.nl/naturalis/specimen/ZMA.MOLL.114329
15044	DMM	1978-05-01	Belgium, Westfladern, Oostduinkerke	51.1282	2.64826
9118	DMM	1981-05-17	Denmark, Syddanmark, Rømø	55.2108	8.51583
ZMA.MOLL.114311	NMNL	1982-07-23	The Netherlands, Friesland, Terschelling	53.352	5.15167	http://data.biodiversitydata.nl/naturalis/specimen/ZMA.MOLL.114311
ZMA.MOLL.114328	NMNL	1984-04-14	The Netherlands, Friesland, Terschelling	53.352	5.15167	http://data.biodiversitydata.nl/naturalis/specimen/ZMA.MOLL.114328
ZMA.MOLL.114314	NMNL	1984-04-21	The Netherlands, Friesland, Terschelling	53.352	5.15167	http://data.biodiversitydata.nl/naturalis/specimen/ZMA.MOLL.114314
ZMA.MOLL.114327	NMNL	1985-07-24	The Netherlands, Friesland, Terschelling	53.352	5.15167	http://data.biodiversitydata.nl/naturalis/specimen/ZMA.MOLL.114327
ZMA.MOLL.114316	NMNL	1986-08-13	The Netherlands, Friesland, Terschelling	53.352	5.15167	http://data.biodiversitydata.nl/naturalis/specimen/ZMA.MOLL.114316
3522627	NHML	1987-10-14	Europe	52.2584	4.3747	https://doi.org/10.5519/0002965
310196	SMF	1988-07-11	England, estuary of the Thames	51.6166	0.958646
310204	SMF	1988-07-11	England, northern estuary of the Thames	51.5099	0.545285
310211	SMF	1988-07-11	England, Norfolk, in front of Great-Yarmouth	52.6641	1.73045
310217	SMF	1988-07-11	England, Norfolk, in front of Cromer	52.9437	1.23389
ZMA.MOLL.110	NMNL	1990-09-10	Denmark, Nordjylland, Lyngsa, Kattegat	57.2481	10.5503	http://data.biodiversitydata.nl/naturalis/specimen/ZMA.MOLL.110
12634	DMM	Oct 1990	Germany, Schleswig-Holstein, Helgoland	54.1908	7.86494
11986	DMM	06.11.1990 - 08.11.1990	Germany, Schleswig-Holstein, Sylt, List, Königshafen	55.028	8.4287
11987	DMM	06.11.1990 - 08.11.1990	Germany, Schleswig-Holstein, Sylt, List, Königshafen	55.028	8.4287
12648	DMM	1991-07-01	England, Brighton beach, English channel	50.8214	-0.155874
13854	DMM	1991-08-25	France, Bretagne, Carnac, Bay of Biscay	47.5835	-3.10362
ZMA.MOLL.114310	NMNL	1993-08-01	The Netherlands, North Holland, Egmond-aan-Zee	52.6201	4.6172	http://data.biodiversitydata.nl/naturalis/specimen/ZMA.MOLL.114310
ZMA.MOLL.90454	NMNL	1994-08-11	The Netherlands, Zeeland, Bruinisse	51.6674	4.09568	http://data.biodiversitydata.nl/naturalis/specimen/ZMA.MOLL.90454
36622	SNSD	Oct 1994	Belgium, Kooksijde, on beach after storm	51.1103	2.60328
ZMA.MOLL.114302	NMNL	1996-06-01	The Netherlands, Zeeland, Brouwershaven, Grevelingenmeer	51.742	3.87452	http://data.biodiversitydata.nl/naturalis/specimen/ZMA.MOLL.114302
12708	DMM	01.06.1996 - 07.06.1996	Sweden, Bohuslän, Kristineberg, zoolog. station, Gullmarnfjord	58.2498	11.4446
40488	SNSD	1998	Germany, Schleswig-Holstein, Sylt, List	55.0344	8.40601
RMNH.MOL.32695	NMNL	1998-08-24	The Netherlands, South Holland, Katwijk	52.1851	4.37202	http://data.biodiversitydata.nl/naturalis/specimen/RMNH.MOL.32695
40487	SNSD	1998-10-16	Germany, Schleswig-Holstein, Sylt, List	55.0344	8.40601
13853	DMM	1999-09-14	France, Bretagne, Regnéville-sur-Mer, English channel	48.9977	-1.55801
