# Supplementary material for: Coming and going – Historical distributions of the European oyster Ostrea edulis Linnaeus, 1758 and the introduced slipper limpet Crepidula fornicata Linnaeus, 1758 in the North Sea
Source: PLoS One. 2019 Oct 24;14(10):e0224249. doi: 10.1371/journal.pone.0224249 (PMC6812771; doi:10.1371/journal.pone.0224249)
Supplement: S5 Table — (XLSX) [file pone.0224249.s007.xlsx]

## Sheet: Crepidula fornicata 21st centur
catalogue number	facility	sampling date	location	latitude	longitude	Publication
44739	SNSD	2002-06-18	Germany, Schleswig-Holstein, Sylt, northern tip	55.0584	8.41638
44740	SNSD	2002-06-18	Germany, Schleswig-Holstein, Sylt, Rantum, West beach	54.7957	8.28178
13855	DMM	2003-04-29	France, Bretagne, Locmariaquer, Pierre Plates beach, Bay of Biscay	47.5837	-2.98956
46038	SNSD	2003-07-24	Germany, Schleswig-Holstein, Helgoland, marine station	54.1837	7.88836
46013	SNSD	2003-07-24	Germany, Niedersachsen, Borkum	53.592	6.6383
13856	DMM	2004-04-20	France, Languedoc, Fleury d‘Aude	42.4356	3.1747
ZMA.MOLL.114293	NMNL	2005-01-03	The Netherlands, North Holland, Hondsbossche Zeewering	52.7392	4.64128	http://data.biodiversitydata.nl/naturalis/specimen/ZMA.MOLL.114293
13857	DMM	2005-05-20	France, Nouvelle-Aquitaine, Ile d’Oleron, La Cotiniere, Bay of Biscay	46.048	-1.41069
RMNH.MOL.102104	NMNL	2006-02-11	The Netherlands, South Holland, Katwijk, north of river Rhine, after a few cold days	52.2115	4.39831	http://data.biodiversitydata.nl/naturalis/specimen/RMNH.MOL.102104
RMNH.MOL.111802	NMNL	2008-09-06	The Netherlands, Zeeland, coast between de Roggenplaat and Mariaanshoofd, Oosterschelde	51.5663	3.94896	http://data.biodiversitydata.nl/naturalis/specimen/RMNH.MOL.111802
RMNH.MOL.112089	NMNL	2008-10-17	The Netherlands, Zeeland, Yerseke, Oosterschelde, market oysters from the Oost company	51495	4.05344	http://data.biodiversitydata.nl/naturalis/specimen/RMNH.MOL.112089
RMNH.MOL.126055	NMNL	2010-07-03	The Netherlands, Zeelands, near Terneuzen, Westerschelde	51.4543	3.43033	http://data.biodiversitydata.nl/naturalis/specimen/RMNH.MOL.126055
Mo 8902/21	ZMK	16.10.2017-19.10.2017	Germany, Schleswig-Holstein, Sylt, Rantum, in front of Café „Strandmuschel“, beach on low tide	54.8472	8.28567
